# Supplementary material for: PMO12@ZIF-8/ZnO-derived hierarchical porous molybdenum carbide as efficient electrocatalysts for hydrogen evolution
Source: Royal Society of Chemistry journal article supplement (doi:10.1039/d1nj01096d), 2021-01-01
Supplement: d1nj01096d1.pdf [file d1nj01096d1.pdf]

# **PMo<sub>12</sub>@ZIF-8/ZnO Derived Hierarchical Porous Molybdenum Carbide as Efficient Electrocatalysts for Hydrogen Evolution**

Jiao Li<sup>†a</sup>, Xiao Li,<sup>†\*bc</sup> Jing Sun<sup>bc</sup>, Xiaoli Hu<sup>\*bc</sup> and Zhongmin Su<sup>\*bc</sup>

<sup>a</sup>School of Materials science and Engineering, Changchun University of Science and Technology, Changchun 130022, People's Republic of China.

<sup>b</sup>School of Chemical and Environmental Engineering, Changchun University of Science and Technology, Changchun, People's Republic of China.

<sup>c</sup>Jilin Provincial Science and Technology Innovation Centre of Optical Materials and Chemistry, Changchun University of Science and Technology, Changchun, 130022, People's Republic of China.

E-mail: [lix@cust.edu.cn](mailto:lix@cust.edu.cn), [zmsu@nenu.edu.cn](mailto:zmsu@nenu.edu.cn).

## **Experimental section**

### **Chemicals**

Zinc oxide (ZnO, Sinopharm Chemical Reagent Co., Ltd), 2-methyl imidazole (Jinan Henghua Sci. & Tec. Co., Ltd) and phosphomolybdic acid hydrate (Shanghai Xushuo Biological Technology Co., Ltd) were directly used without purification.

### **Synthesis of PMo<sub>12</sub>@ZIF-8/ZnO**

The synthesis procedure of PMo<sub>12</sub>@ZIF-8/ZnO was according to the literature [1]. In detail, 5.0 mmol ZnO, 10.0 mmol 2-MeIM and 0.6 mmol H<sub>3</sub>PMo<sub>12</sub>O<sub>40</sub>·xH<sub>2</sub>O were successively put into the mill pot with 2 mL ethanol and mixed evenly. An appropriate amount of agate ball (10 mm) was added to the ball grinding tank, and the ball grinding was carried out at a speed of 40 Hz for 30 min. The resulting solid product was washed with large amounts of water and ethanol to remove excess polyacids and then dried at 60 °C for 12 h.

### **Synthesis of MoC@NC**

Firstly, the PMo<sub>12</sub>@ZIF-8 composite material was placed in a porcelain boat and heated to 900 °C for 2 h with the heating rate of 5 °C min<sup>-1</sup> under Ar. Then, the obtained black powder was immersed in dilute hydrochloric acid and ultrasonic for 30 min. Finally, the samples are centrifuged and washed with a large amount of water until the solution

is neutral. The resulting samples were dried overnight at 80 °C. In addition, a contrast sample of NC was synthesized by direct carbonization (900 °C) without PMo<sub>12</sub>.

### **characterizations**

Powder X-ray diffraction (PXRD) patterns (Siemens D5005 diffractometer) were obtained by the Cu-K $\alpha$  ( $\lambda=1.54118$  Å) radiation with the  $2\theta$  of 5-80°. IR spectroscopy (Alpha Centaur FT/IR spectrophotometer) was collected with the range of 4000-400 cm<sup>-1</sup>. Transmission electron microscopy (TEM) images were measured via JEOL-2100F transmission electron microscope and SU8000 ESEM FEG energy dispersive X-ray detector (EDX). Raman spectra was gathered by the A JY Labram HR 800. The N<sub>2</sub> sorption tests (automatic volumetric adsorption equipment (Belsorp mini II)) were used to measure the surface area and pore volume of the catalyst. X-ray photoelectron spectroscopy (XPS) spectrums were obtained on a PHI Quantera SXM (ULVAC-PHI) with an Al K $\alpha$  X-ray source.

### **Electrochemical measurements**

All electrochemical tests were performed on a CHI 660e instrument with a traditional three-electrode system. In this work, glassy carbon electrode, graphite and Ag/AgCl electrode were used for working electrode, counter electrode and reference electrode respectively. 0.5 M H<sub>2</sub>SO<sub>4</sub> and 1.0 M KOH solution were served as electrolyte for hydrogen evolution reaction (HER). 6.0 mg catalysts were dispersed in a mixture of 100  $\mu$ L of 5 wt% naphthol, 200  $\mu$ L of water and 200  $\mu$ L of ethanol to form a homogeneous solution through ultrasound for 1 h. 5  $\mu$ L of suspended liquid was dropped onto the glassy carbon electrode and the catalyst load was 0.85 mg cm<sup>-2</sup>. Furthermore, the commercial Pt/C electrode was prepared in the same method.

The electrolyte was degassed with nitrogen before the polarization curve was measured. All potential reference reversible hydrogen electrodes were calculated using the Nernst equation:  $E_{RHE} = E_{Ag/AgCl} + 0.059 \cdot pH + 0.197V$ . Tafel plots were calculated by the equation of  $\eta = a + b \log j$ . Cyclic voltammetry (CV) was tested with the scan rates of 5, 10, 20, 50, 80 and 100 ranged from 0.1 to -0.1V. Electrochemical impedance spectroscopy (EIS) was measured at specific voltage and ranged from 0.1 to 100000 Hz. The stability was measured by chronoamperometry with  $i$ - $t$  curves with a constant

working potential for 24 h in 0.5 M H<sub>2</sub>SO<sub>4</sub> and 1.0 M KOH solutions respectively.

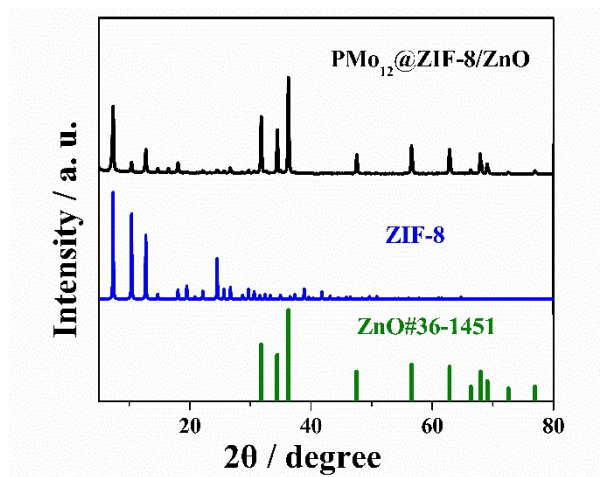

**Figure S1.** XRD patterns of PMo<sub>12</sub>@ZIF-8 (Blue) and ZIF-8 simulated curves (Black).

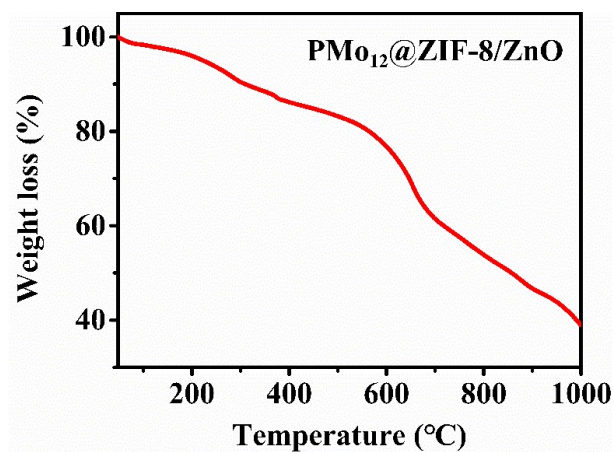

**Figure S2.** The TGA curves for PMo<sub>12</sub>@ZIF-8/ZnO.

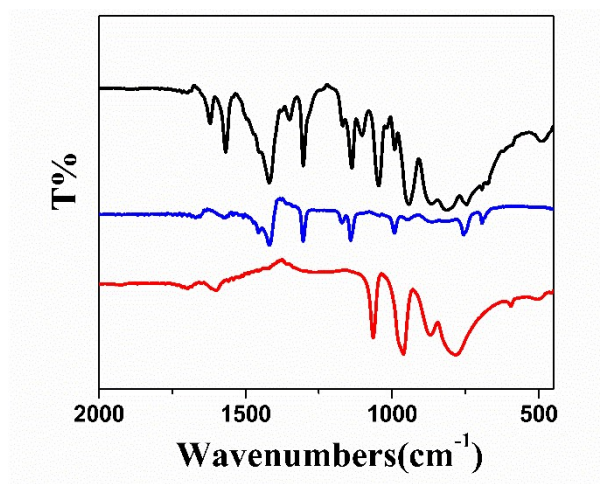

**Figure S3.** The IR spectrums of PMo<sub>12</sub>@ZIF-8/ZnO (Black), ZIF-8 (Blue) and PMo<sub>12</sub> (Red).

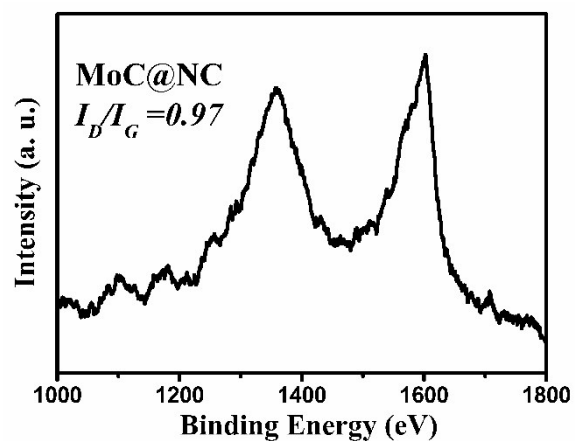

Figure S4. The Raman spectrum of MoC@NC with the carbonization temperature of 900 °C.

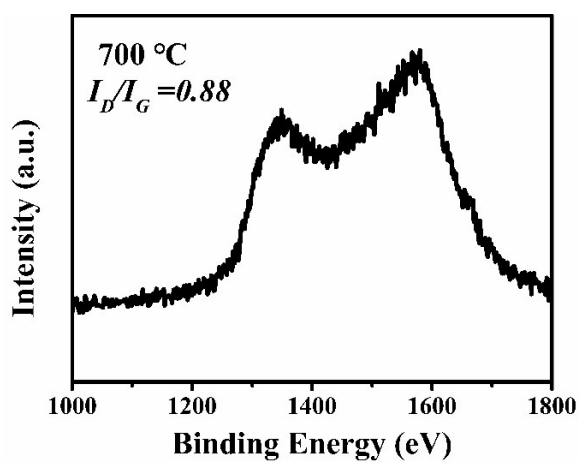

Figure S5. The Raman spectrum of MoC@NC with the carbonization temperature of 700 °C.

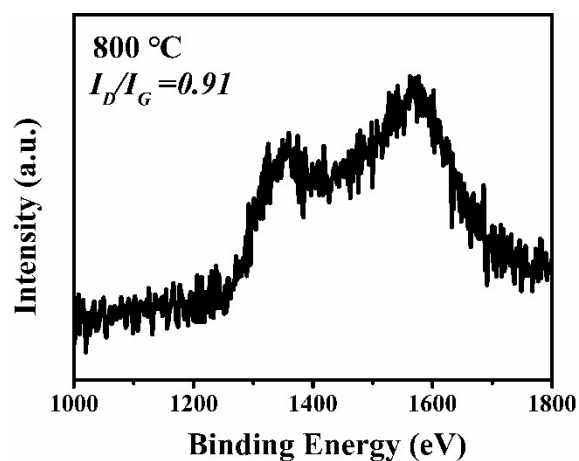

Figure S6. The Raman spectrum of MoC@NC with the carbonization temperature of 800 °C.

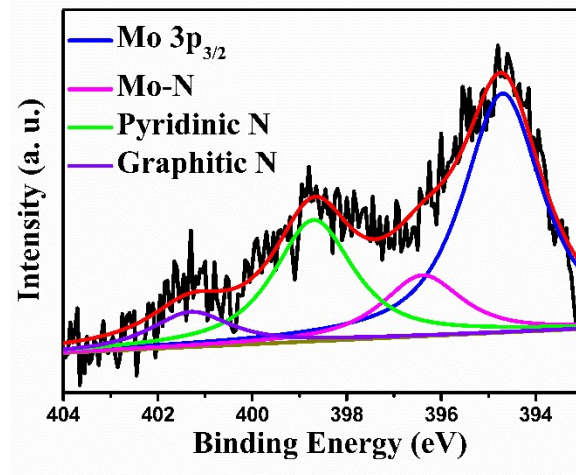

Figure S7. X-ray photoelectron spectroscopy (XPS) spectrums of N for MoC@NC.

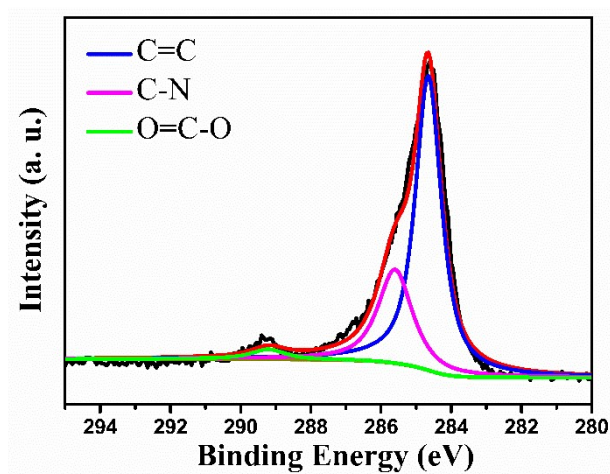

Figure S8. X-ray photoelectron spectroscopy (XPS) spectrums of C for MoC@NC.

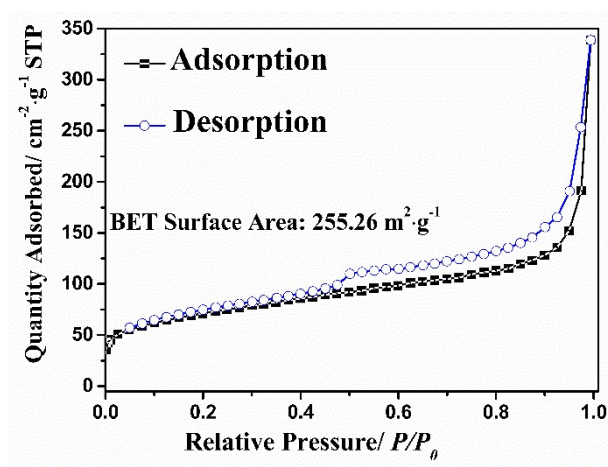

Figure S9. N<sub>2</sub> adsorption–desorption isotherms of MoC@NC.

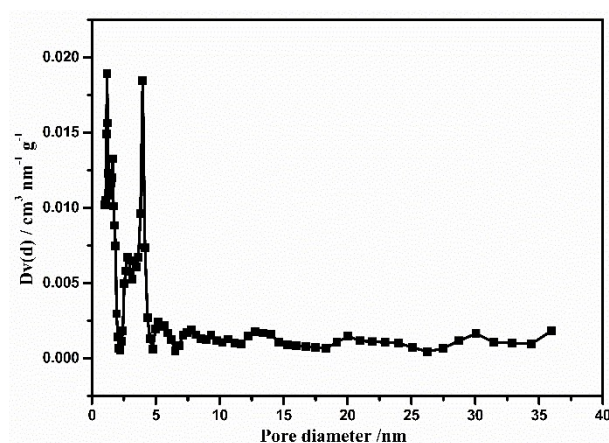

Figure S10. pore diameter distribution diagram of MoC@NC.

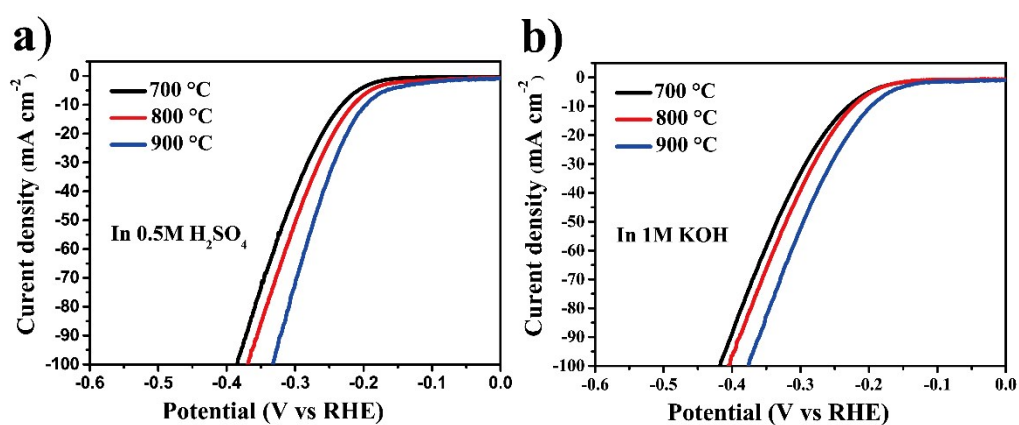

Figure S11. Polarization curves of MoC@NC obtained by carbonization for 2 h at different temperatures (700, 800 and 900 °C), (a) acidic solution and (b) alkaline solution.

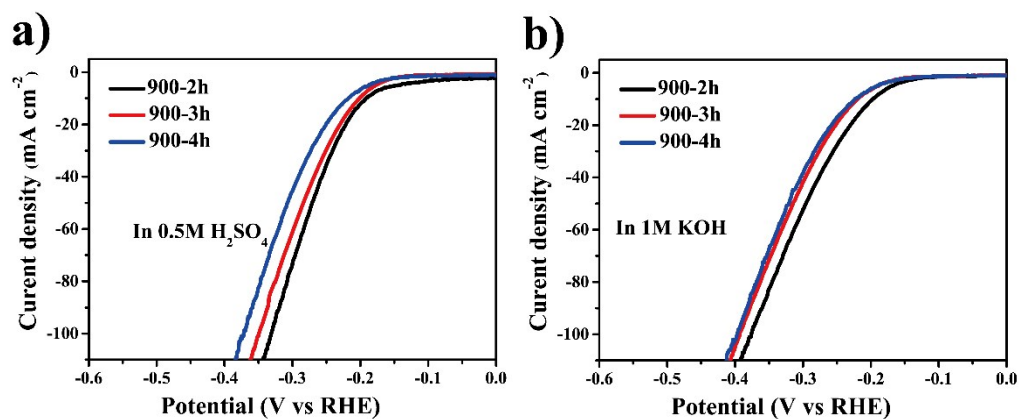

Figure S12. Polarization curves of MoC@NC obtained by carbonization at 900 °C with different times (2, 3 and 4 h), (a) acidic solution and (b) alkaline solution.



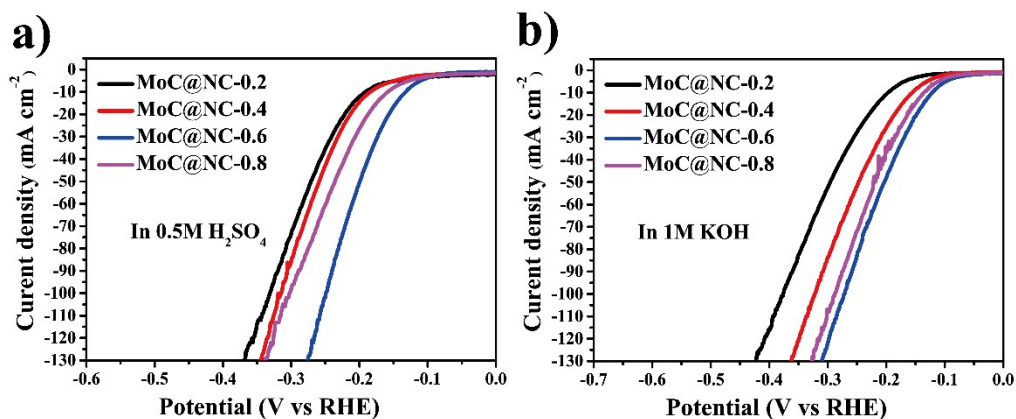

**Figure S13.** Polarization curves of MoC@NC obtained by different load (0.2, 0.4, 0.6 and 0.8 mmol), (a) acidic solution and (b) alkaline solution.

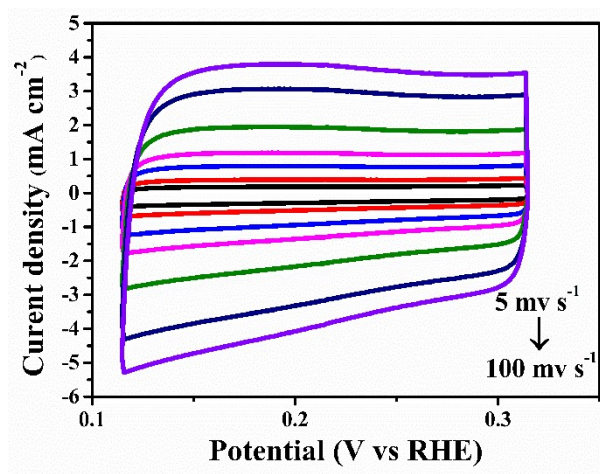

**Figure S14.** Cyclic voltammogram curves of MoC@NC at different sweeping speeds in 0.5 M H<sub>2</sub>SO<sub>4</sub>.

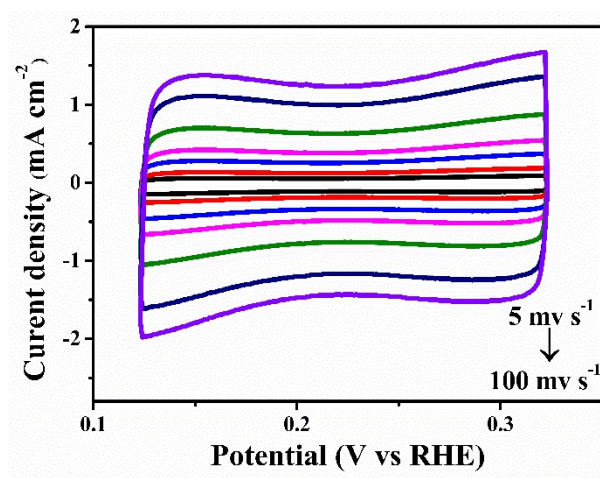

**Figure S15.** Cyclic voltammogram curves of MoC@NC at different sweeping speeds in 1.0 M H<sub>2</sub>SO<sub>4</sub>.

KOH.

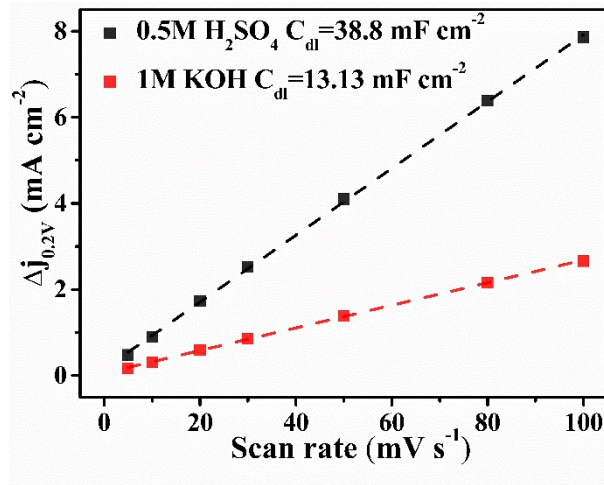

Figure S16. Double layer capacitance ( $C_{dl}$ ) spectra of MoC@NC in 0.5 M H<sub>2</sub>SO<sub>4</sub> and 1.0 M

KOH.

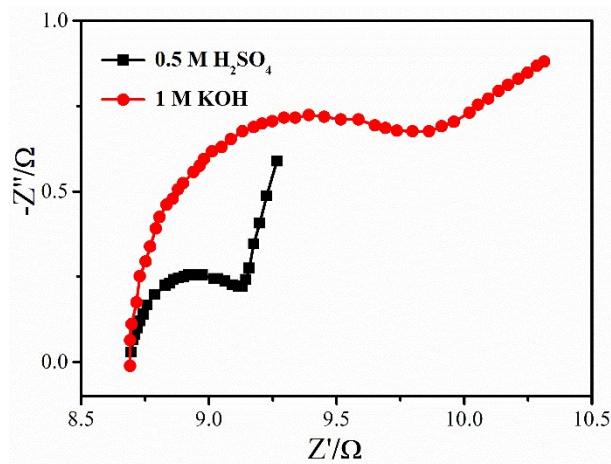

Figure S17. Nyquist plots of MoC@NC in 0.5 M H<sub>2</sub>SO<sub>4</sub> and 1.0 M KOH.

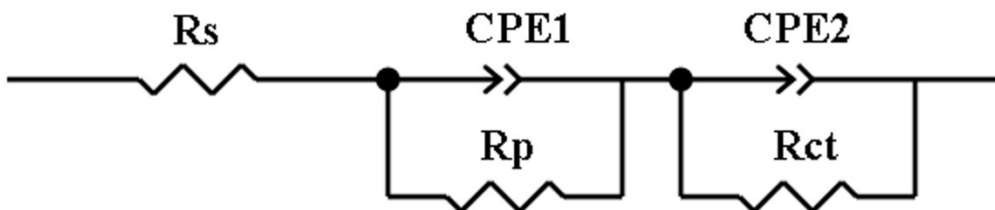

Figure S18. Fitting circuit diagram of MoC@NC in 0.5 M H<sub>2</sub>SO<sub>4</sub> and 1.0 M KOH.



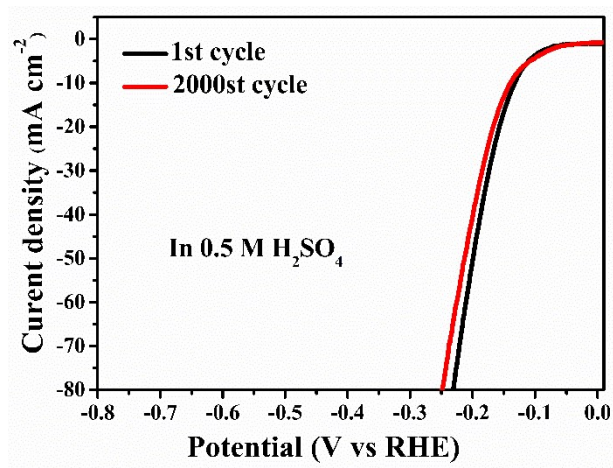

**Figure S19.** Polarization curves of MoC@NC before and after 2000 cycles in 0.5 M H<sub>2</sub>SO<sub>4</sub>.

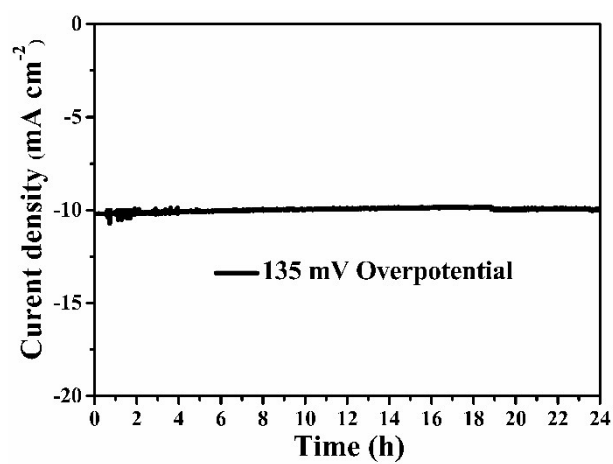

**Figure S20.** Time-dependent current density curve of MoC@NC in 0.5 M H<sub>2</sub>SO<sub>4</sub>.

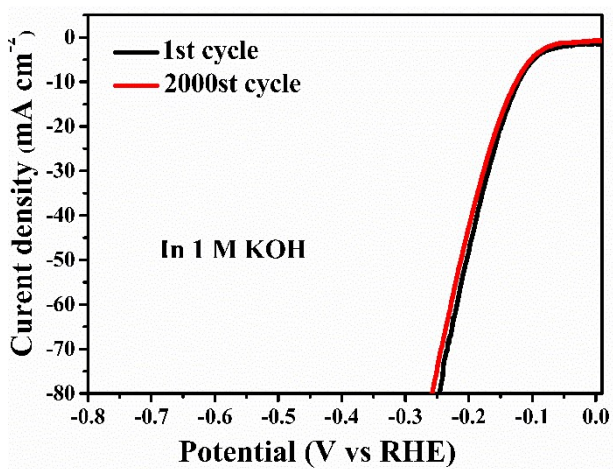

**Figure S21.** Polarization curves of MoC@NC before and after 2000 cycles in 1.0 M KOH.

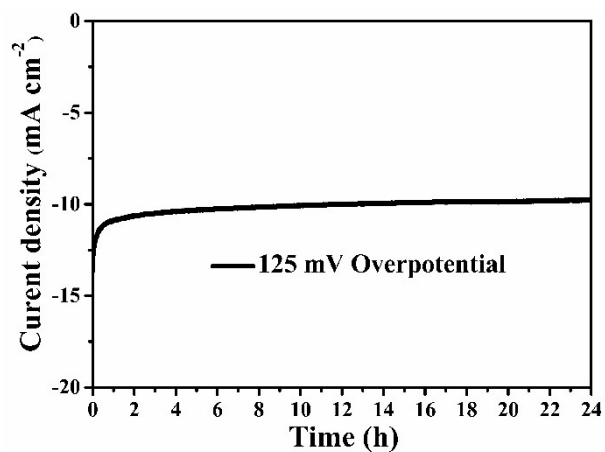

**Figure S22.** Time-dependent current density curve of **MoC@NC** in 1.0 M KOH.

**Table S1.** Element content values at different calcination temperatures.

| Elements content (%) | Mo     | C      |
|----------------------|--------|--------|
| 700 °C               | 50.620 | 20.340 |
| 800 °C               | 52.580 | 17.570 |
| 900 °C               | 55.350 | 15.730 |

**Table S2.** Comparison of HER performance of MoC@NC with other MoC-based HER catalysts.

| Catalysts                              | Electrolyte                          | $\eta_{10}$ (mV) | Tafel Slope<br>(mV dec <sup>-1</sup> ) | Stability   | Ref.      |
|----------------------------------------|--------------------------------------|------------------|----------------------------------------|-------------|-----------|
| MoC@NC                                 | 0.5 M H <sub>2</sub> SO <sub>4</sub> | 132              | 75                                     | 24 h        | This work |
|                                        | 1.0 M KOH                            | 122              | 80                                     | 24 h        |           |
| Cu-Mo <sub>x</sub> C <sub>y</sub>      | 1.0 M KOH                            | 190              | 51                                     | 1000 cycles | [2]       |
| MoC-MoP/BCNC                           | 0.5 M H <sub>2</sub> SO <sub>4</sub> | 158              | 58                                     | 24 h        | [3]       |
| NFs                                    | 1.0 M KOH                            | 137              | 65                                     | 24 h        |           |
| B-MoC                                  | 0.5 M H <sub>2</sub> SO <sub>4</sub> | 285              | 128                                    | 8 h         | [4]       |
| MoC-Mo <sub>2</sub> C                  | 0.5 M H <sub>2</sub> SO <sub>4</sub> | 126              | 43                                     | 3000 cycles | [5]       |
|                                        | 1.0 M KOH                            | 120              | 42                                     | 3000 cycles |           |
| N <sub>3</sub> P-Mo <sub>x</sub> C NF  | 0.5 M H <sub>2</sub> SO <sub>4</sub> | 107              | 65.1                                   | 1000 cycles | [6]       |
|                                        | 1.0 M KOH                            | 135              | 57.1                                   | 1000 cycles |           |
| N-Mo <sub>x</sub> C@C HSs              | 0.5 M H <sub>2</sub> SO <sub>4</sub> | 172              | 60                                     | 12 h        | [7]       |
| nanoMoC@GS                             | 0.5 M H <sub>2</sub> SO <sub>4</sub> | 124              | 43                                     | 10 h        | [8]       |
|                                        | 1.0 M KOH                            | 77               | 50                                     | -           |           |
|                                        | 0.5 M H <sub>2</sub> SO <sub>4</sub> | 89               | 45                                     | 14 h        |           |
| MoP/Mo <sub>2</sub> C@C                | 1.0 M KOH                            | 75               | 58                                     | 14 h        | [9]       |
|                                        | 1.0 M PBS                            | 136              | 93                                     | 14 h        |           |
| P-Mo <sub>2</sub> C@NC                 | 0.5 M H <sub>2</sub> SO <sub>4</sub> | 109              | 76                                     | 12 h        | [10]      |
|                                        | 1.0 M PBS                            | 159              | -                                      | 12 h        |           |
|                                        | 1.0 M KOH                            | 83               | -                                      | 12 h        |           |
| Mo <sub>2</sub> C-MoO <sub>x</sub> /CC | 1.0 M HClO <sub>4</sub>              | 60               | 53                                     | 60          | [11]      |

## Reference

- [1] Li R, Ren XQ, Zhao JS, Feng X, Jiang X, Fan XX, Lin ZG, Li XG, Hu CW, Wang B. Polyoxometallates trapped in a zeolitic imidazolate framework leading to high uptake and selectivity of bioactive molecules. *J. Mater. Chem. A* 2014;2:2168. <https://doi.org/10.1039/C3TA14267A>.

- [2] Li P, Wu D, Dai C, Huang X, Li C, Yin Z, Zhou S, Lv Z, Cheng D, Zhu J. Controlled synthesis of copper-doped molybdenum carbide catalyst with enhanced activity and stability for hydrogen evolution reaction. *Catalysis Letters* 2019;149:1368–1374. <https://doi.org/10.1007/s10562-019-02695-w>.
- [3] Chen NN, Mo Q, He L, Huang X, Yang L, Zeng J, Gao Q. Heterostructured MoC-MoP/N-doped carbon nanofibers as efficient electrocatalysts for hydrogen evolution reaction. *Electrochimica Acta* 2019;299:708-716. <https://doi.org/10.1016/j.electacta.2019.01.054>.
- [4] Lin Q, Shang CQ, Chen ZH, Wang X, Zhou GF. Boron-doped molybdenum carbide as a pH-independent electrocatalyst for the hydrogen evolution reaction. *International Journal of Hydrogen Energy* 2020;45(55):30659-30665. <https://doi.org/10.1016/j.ijhydene.2020.08.033>.
- [5] Lin HL, Shi ZP, He S, Yu X, Wang S, Gao QS, Tang Y. Heteronanowires of MoC-Mo<sub>2</sub>C as efficient electrocatalysts for hydrogen evolution reaction. *Chem. Sci* 2016;7:3399. <https://doi.org/10.1039/C6SC00077K>.
- [6] Ji L, Wang J, Xue T, Dong H, Chen Z. N,P-doped molybdenum carbide nanofibers for efficient hydrogen production. *ACS Applied Materials & Interfaces* 2018; 10(17):14632–14640. <https://doi.org/10.1021/acsami.8b00363>.
- [7] Xiong TL, Jia J, Wei ZQ, Zeng LL, Deng YQ, Zhou WJ, Chen SW. N-doped carbon-wrapped Mo<sub>x</sub>C heterophase sheets for high-efficiency electrochemical hydrogen production. *Chemical Engineering Journal* 2019;358:362-368. <https://doi.org/10.1016/j.cej.2018.09.047>.
- [8] Shi ZP, Wang YX, Lin HL, Zhang HB, Shen MK, Xie SH, Zhang YH, Gao QS, Tang Y. Porous nanoMoC@graphite shell derived from a MOFs-directed strategy: an efficient electrocatalyst for the hydrogen evolution reaction. *J. Mater. Chem. A* 2016; 4:6006-6013. <https://doi.org/10.1039/C6TA01900E>.
- [9] Zhang LN, Li SH, Tan HQ, Ullah Khan SF, Ma YY. MoP/Mo<sub>2</sub>C@C: A new combination of electrocatalysts for highly Efficient hydrogen evolution over the entire pH range. *ACS Appl. Mater. Interfaces* 2017;9:16270–16279. <https://doi.org/10.1021/acsami.7b03823>.

- [10] Yan G, Feng XJ, Ullah Khan SF, Xiao LG, Xi WG, Tan HQ, Ma YY, Zhang LN, Li YG. Polyoxometalate and resin-derived P-doped Mo<sub>2</sub>C@N-doped carbon as a highly efficient hydrogen-evolution reaction catalyst at all pH values. *Chem. Asian J* 2018;13:158–163. <https://doi.org/10.1002/asia.201701400>
- [11] He LQ, Zhang WB, Mo QJ, Huang WJ, Yang LC, Gao QS. Molybdenum carbide-oxide heterostructures: in situ surface reconfiguration toward efficient electrocatalytic hydrogen evolution. *Angew. Chem. Int. Ed* 2020;59:3544–3548. <https://doi.org/10.1002/anie.201914752>.
